# Supplementary material for: Integrative analysis links autophagy to intrauterine adhesion and establishes autophagy-related circRNA-miRNA-mRNA regulatory network
Source: Aging (Albany NY). 2023 Aug 23;15(16):8275–97. doi: 10.18632/aging.204969 (PMC10497020; doi:10.18632/aging.204969)
Supplement: Supplementary Table 1 [file aging-15-204969-s002.xlsx]

## Sheet: Autophagy-Related Genes 
Supplementary Table 1. Autophagy-related genes.
A (top)
GeneId	Name	Symbol
55626	autophagy/beclin-1 regulator 1	AMBRA1
8542	apolipoprotein L, 1	APOL1
405	aryl hydrocarbon receptor nuclear translocator	ARNT
410	arylsulfatase A	ARSA
411	arylsulfatase B	ARSB
468	activating transcription factor 4 (tax-responsive enhancer element B67)	ATF4
22926	activating transcription factor 6	ATF6
83734	ATG10 autophagy related 10 homolog (S. cerevisiae)	ATG10
9140	ATG12 autophagy related 12 homolog (S. cerevisiae)	ATG12
55054	ATG16 autophagy related 16-like 1 (S. cerevisiae)	ATG16L1
89849	ATG16 autophagy related 16-like 2 (S. cerevisiae)	ATG16L2
23130	ATG2 autophagy related 2 homolog A (S. cerevisiae)	ATG2A
55102	ATG2 autophagy related 2 homolog B (S. cerevisiae)	ATG2B
64422	ATG3 autophagy related 3 homolog (S. cerevisiae)	ATG3
115201	ATG4 autophagy related 4 homolog A (S. cerevisiae)	ATG4A
23192	ATG4 autophagy related 4 homolog B (S. cerevisiae)	ATG4B
84938	ATG4 autophagy related 4 homolog C (S. cerevisiae)	ATG4C
84971	ATG4 autophagy related 4 homolog D (S. cerevisiae)	ATG4D
9474	ATG5 autophagy related 5 homolog (S. cerevisiae)	ATG5
10533	ATG7 autophagy related 7 homolog (S. cerevisiae)	ATG7
79065	ATG9 autophagy related 9 homolog A (S. cerevisiae)	ATG9A
285973	ATG9 autophagy related 9 homolog B (S. cerevisiae)	ATG9B
471	5-aminoimidazole-4-carboxamide ribonucleotide formyltransferase/IMP cyclohydrolase	ATIC
B (top)
GeneId	Name	Symbol
573	BCL2-associated athanogene	BAG1
9531	BCL2-associated athanogene 3	BAG3
578	BCL2-antagonist/killer 1	BAK1
581	BCL2-associated X protein	BAX
596	B-cell CLL/lymphoma 2	BCL2
598	BCL2-like 1	BCL2L1
8678	beclin 1, autophagy related	BECN1
637	BH3 interacting domain death agonist	BID
332	baculoviral IAP repeat-containing 5	BIRC5
57448	baculoviral IAP repeat-containing 6	BIRC6
662	BCL2/adenovirus E1B 19kDa interacting protein 1	BNIP1
664	BCL2/adenovirus E1B 19kDa interacting protein 3	BNIP3
665	BCL2/adenovirus E1B 19kDa interacting protein 3-like	BNIP3L
C (top)
GeneId	Name	Symbol
60673	chromosome 12 open reading frame 44	C12orf44
23591	chromosome 17 open reading frame 88	C17orf88
10241	calcium binding and coiled-coil domain 2	CALCOCO2
10645	calcium/calmodulin-dependent protein kinase kinase 2, beta	CAMKK2
821	calnexin	CANX
823	calpain 1, (mu/I) large subunit	CAPN1
11132	calpain 10	CAPN10
824	calpain 2, (m/II) large subunit	CAPN2
826	calpain, small subunit 1	CAPNS1
834	caspase 1, apoptosis-related cysteine peptidase (interleukin 1, beta, convertase)	CASP1
836	caspase 3, apoptosis-related cysteine peptidase	CASP3
837	caspase 4, apoptosis-related cysteine peptidase	CASP4
841	caspase 8, apoptosis-related cysteine peptidase	CASP8
6347	chemokine (C-C motif) ligand 2	CCL2
729230	chemokine (C-C motif) receptor 2	CCR2
4179	CD46 molecule, complement regulatory protein	CD46
1026	cyclin-dependent kinase inhibitor 1A (p21, Cip1)	CDKN1A
1027	cyclin-dependent kinase inhibitor 1B (p27, Kip1)	CDKN1B
1029	cyclin-dependent kinase inhibitor 2A (melanoma, p16, inhibits CDK4)	CDKN2A
8837	CASP8 and FADD-like apoptosis regulator	CFLAR
25978	chromatin modifying protein 2B	CHMP2B
128866	chromatin modifying protein 4B	CHMP4B
1201	ceroid-lipofuscinosis, neuronal 3	CLN3
1508	cathepsin B	CTSB
1509	cathepsin D	CTSD
1514	cathepsin L1	CTSL1
6376	chemokine (C-X3-C motif) ligand 1	CX3CL1
7852	chemokine (C-X-C motif) receptor 4	CXCR4
D (top)
GeneId	Name	Symbol
1612	death-associated protein kinase 1	DAPK1
23604	death-associated protein kinase 2	DAPK2
1649	DNA-damage-inducible transcript 3	DDIT3
9077	DIRAS family, GTP-binding RAS-like 3	DIRAS3
10395	deleted in liver cancer 1	DLC1
3337	DnaJ (Hsp40) homolog, subfamily B, member 1	DNAJB1
4189	DnaJ (Hsp40) homolog, subfamily B, member 9	DNAJB9
55332	DNA-damage regulated autophagy modulator 1	DRAM1
E (top)
GeneId	Name	Symbol
9695	ER degradation enhancer, mannosidase alpha-like 1	EDEM1
1938	eukaryotic translation elongation factor 2	EEF2
29904	eukaryotic elongation factor-2 kinase	EEF2K
1956	epidermal growth factor receptor (erythroblastic leukemia viral (v-erb-b) oncogene homolog, avian)	EGFR
5610	eukaryotic translation initiation factor 2-alpha kinase 2	EIF2AK2
9451	eukaryotic translation initiation factor 2-alpha kinase 3	EIF2AK3
1965	eukaryotic translation initiation factor 2, subunit 1 alpha, 35kDa	EIF2S1
1978	eukaryotic translation initiation factor 4E binding protein 1	EIF4EBP1
1981	eukaryotic translation initiation factor 4 gamma, 1	EIF4G1
2064	v-erb-b2 erythroblastic leukemia viral oncogene homolog 2, neuro/glioblastoma derived oncogene homolog (avian)	ERBB2
2081	endoplasmic reticulum to nucleus signaling 1	ERN1
30001	ERO1-like (S. cerevisiae)	ERO1L
F (top)
GeneId	Name	Symbol
8772	Fas (TNFRSF6)-associated via death domain	FADD
55578	family with sequence similarity 48, member A	FAM48A
355	Fas (TNF receptor superfamily, member 6)	FAS
2280	FK506 binding protein 1A, 12kDa	FKBP1A
2281	FK506 binding protein 1B, 12.6 kDa	FKBP1B
2353	FBJ murine osteosarcoma viral oncogene homolog	FOS
2308	forkhead box O1	FOXO1
2309	forkhead box O3	FOXO3
G (top)
GeneId	Name	Symbol
2548	glucosidase, alpha; acid	GAA
11337	GABA(A) receptor-associated protein	GABARAP
23710	GABA(A) receptor-associated protein like 1	GABARAPL1
11345	GABA(A) receptor-associated protein-like 2	GABARAPL2
2597	glyceraldehyde-3-phosphate dehydrogenase	GAPDH
2773	guanine nucleotide binding protein (G protein), alpha inhibiting activity polypeptide 3	GNAI3
10399	guanine nucleotide binding protein (G protein), beta polypeptide 2-like 1	GNB2L1
57120	golgi-associated PDZ and coiled-coil motif containing	GOPC
2894	glutamate receptor, ionotropic, delta 1	GRID1
2895	glutamate receptor, ionotropic, delta 2	GRID2
H (top)
GeneId	Name	Symbol
3065	histone deacetylase 1	HDAC1
10013	histone deacetylase 6	HDAC6
9146	hepatocyte growth factor-regulated tyrosine kinase substrate	HGS
3091	hypoxia inducible factor 1, alpha subunit (basic helix-loop-helix transcription factor)	HIF1A
3326	heat shock protein 90kDa alpha (cytosolic), class B member 1	HSP90AB1
3309	heat shock 70kDa protein 5 (glucose-regulated protein, 78kDa)	HSPA5
3312	heat shock 70kDa protein 8	HSPA8
26353	heat shock 22kDa protein 8	HSPB8
I (top)
GeneId	Name	Symbol
3458	interferon, gamma	IFNG
3551	inhibitor of kappa light polypeptide gene enhancer in B-cells, kinase beta	IKBKB
9641	inhibitor of kappa light polypeptide gene enhancer in B-cells, kinase epsilon	IKBKE
11009	interleukin 24	IL24
345611	immunity-related GTPase family, M	IRGM
3675	integrin, alpha 3 (antigen CD49C, alpha 3 subunit of VLA-3 receptor)	ITGA3
3655	integrin, alpha 6	ITGA6
3688	integrin, beta 1 (fibronectin receptor, beta polypeptide, antigen CD29 includes MDF2, MSK12)	ITGB1
3691	integrin, beta 4	ITGB4
3708	inositol 1,4,5-triphosphate receptor, type 1	ITPR1
G (top)
GeneId	Name	Symbol
2548	glucosidase, alpha; acid	GAA
11337	GABA(A) receptor-associated protein	GABARAP
23710	GABA(A) receptor-associated protein like 1	GABARAPL1
11345	GABA(A) receptor-associated protein-like 2	GABARAPL2
2597	glyceraldehyde-3-phosphate dehydrogenase	GAPDH
2773	guanine nucleotide binding protein (G protein), alpha inhibiting activity polypeptide 3	GNAI3
10399	guanine nucleotide binding protein (G protein), beta polypeptide 2-like 1	GNB2L1
57120	golgi-associated PDZ and coiled-coil motif containing	GOPC
2894	glutamate receptor, ionotropic, delta 1	GRID1
2895	glutamate receptor, ionotropic, delta 2	GRID2
K (top)
GeneId	Name	Symbol
9711	KIAA0226	KIAA0226
9776	KIAA0652	KIAA0652
22863	KIAA0831	KIAA0831
3799	kinesin family member 5B	KIF5B
54800	kelch-like 24 (Drosophila)	KLHL24
L (top)
GeneId	Name	Symbol
3916	lysosomal-associated membrane protein 1	LAMP1
3920	lysosomal-associated membrane protein 2	LAMP2
M (top)
GeneId	Name	Symbol
84557	microtubule-associated protein 1 light chain 3 alpha	MAP1LC3A
81631	microtubule-associated protein 1 light chain 3 beta	MAP1LC3B
440738	microtubule-associated protein 1 light chain 3 gamma	MAP1LC3C
5609	mitogen-activated protein kinase kinase 7	MAP2K7
5594	mitogen-activated protein kinase 1	MAPK1
5595	mitogen-activated protein kinase 3	MAPK3
5599	mitogen-activated protein kinase 8	MAPK8
9479	mitogen-activated protein kinase 8 interacting protein 1	MAPK8IP1
5601	mitogen-activated protein kinase 9	MAPK9
51360	membrane-bound transcription factor peptidase, site 2	MBTPS2
64223	MTOR associated protein, LST8 homolog (S. cerevisiae)	MLST8
64419	myotubularin related protein 14	MTMR14
2475	mechanistic target of rapamycin (serine/threonine kinase)	MTOR
4609	v-myc myelocytomatosis viral oncogene homolog (avian)	MYC
N (top)
GeneId	Name	Symbol
92345	nuclear assembly factor 1 homolog (S. cerevisiae)	NAF1
10135	nicotinamide phosphoribosyltransferase	NAMPT
4077	neighbor of BRCA1 gene 1	NBR1
10787	NCK-associated protein 1	NCKAP1
4780	nuclear factor (erythroid-derived 2)-like 2	NFE2L2
4790	nuclear factor of kappa light polypeptide gene enhancer in B-cells 1	NFKB1
159296	NK2 transcription factor related, locus 3 (Drosophila)	NKX2-3
58484	NLR family, CARD domain containing 4	NLRC4
4864	Niemann-Pick disease, type C1	NPC1
3084	neuregulin 1	NRG1
9542	neuregulin 2	NRG2
10718	neuregulin 3	NRG3
O (top)
GeneId	Name	Symbol
P (top)
GeneId	Name	Symbol
5034	prolyl 4-hydroxylase, beta polypeptide	P4HB
5071	Parkinson disease (autosomal recessive, juvenile) 2, parkin	PARK2
142	poly (ADP-ribose) polymerase 1	PARP1
8682	phosphoprotein enriched in astrocytes 15	PEA15
27043	proline, glutamate and leucine rich protein 1	PELP1
5195	peroxisomal biogenesis factor 14	PEX14
8504	peroxisomal biogenesis factor 3	PEX3
5289	phosphoinositide-3-kinase, class 3	PIK3C3
30849	phosphoinositide-3-kinase, regulatory subunit 4	PIK3R4
65018	PTEN induced putative kinase 1	PINK1
23645	protein phosphatase 1, regulatory (inhibitor) subunit 15A	PPP1R15A
5564	protein kinase, AMP-activated, beta 1 non-catalytic subunit	PRKAB1
5573	protein kinase, cAMP-dependent, regulatory, type I, alpha (tissue specific extinguisher 1)	PRKAR1A
5580	protein kinase C, delta	PRKCD
5588	protein kinase C, theta	PRKCQ
5728	phosphatase and tensin homolog	PTEN
5753	PTK6 protein tyrosine kinase 6	PTK6
Q (top)
GeneId	Name	Symbol
R (top)
GeneId	Name	Symbol
8766	RAB11A, member RAS oncogene family	RAB11A
5861	RAB1A, member RAS oncogene family	RAB1A
53917	RAB24, member RAS oncogene family	RAB24
83452	RAB33B, member RAS oncogene family	RAB33B
5868	RAB5A, member RAS oncogene family	RAB5A
7879	RAB7A, member RAS oncogene family	RAB7A
5879	ras-related C3 botulinum toxin substrate 1 (rho family, small GTP binding protein Rac1)	RAC1
5894	v-raf-1 murine leukemia viral oncogene homolog 1	RAF1
5925	retinoblastoma 1	RB1
9821	RB1-inducible coiled-coil 1	RB1CC1
5970	v-rel reticuloendotheliosis viral oncogene homolog A (avian)	RELA
10287	regulator of G-protein signaling 19	RGS19
6009	Ras homolog enriched in brain	RHEB
6198	ribosomal protein S6 kinase, 70kDa, polypeptide 1	RPS6KB1
57521	regulatory associated protein of MTOR, complex 1	RPTOR
S (top)
GeneId	Name	Symbol
56681	SAR1 homolog A (S. cerevisiae)	SAR1A
5265	serpin peptidase inhibitor, clade A (alpha-1 antiproteinase, antitrypsin), member 1	SERPINA1
83667	sestrin 2	SESN2
51100	SH3-domain GRB2-like endophilin B1	SH3GLB1
23411	sirtuin (silent mating type information regulation 2 homolog) 1 (S. cerevisiae)	SIRT1
22933	sirtuin (silent mating type information regulation 2 homolog) 2 (S. cerevisiae)	SIRT2
8877	sphingosine kinase 1	SPHK1
83985	spinster homolog 1 (Drosophila)	SPNS1
8878	sequestosome 1	SQSTM1
6767	suppression of tumorigenicity 13 (colon carcinoma) (Hsp70 interacting protein)	ST13
6794	serine/threonine kinase 11	STK11
T (top)
GeneId	Name	Symbol
29110	TANK-binding kinase 1	TBK1
10548	transmembrane 9 superfamily member 1	TM9SF1
81671	transmembrane protein 49	TMEM49
157753	transmembrane protein 74	TMEM74
8743	tumor necrosis factor (ligand) superfamily, member 10	TNFSF10
7157	tumor protein p53	TP53
58476	tumor protein p53 inducible nuclear protein 2	TP53INP2
8626	tumor protein p63	TP63
7161	tumor protein p73	TP73
7248	tuberous sclerosis 1	TSC1
7249	tuberous sclerosis 2	TSC2
286319	tumor suppressor candidate 1	TUSC1
U (top)
GeneId	Name	Symbol
8408	unc-51-like kinase 1 (C. elegans)	ULK1
9706	unc-51-like kinase 2 (C. elegans)	ULK2
25989	unc-51-like kinase 3 (C. elegans)	ULK3
9100	ubiquitin specific peptidase 10	USP10
7405	UV radiation resistance associated gene	UVRAG
V (top)
GeneId	Name	Symbol
9341	vesicle-associated membrane protein 3 (cellubrevin)	VAMP3
6845	vesicle-associated membrane protein 7	VAMP7
7422	vascular endothelial growth factor A	VEGFA
W (top)
GeneId	Name	Symbol
23001	WD repeat and FYVE domain containing 3	WDFY3
11152	WD repeat domain 45	WDR45
56270	WDR45-like	WDR45L
55062	WD repeat domain, phosphoinositide interacting 1	WIPI1
26100	WD repeat domain, phosphoinositide interacting 2	WIPI2
X (top)
GeneId	Name	Symbol
Y (top)
GeneId	Name	Symbol
Z (top)
GeneId	Name	Symbol
53349	zinc finger, FYVE domain containing 1	ZFYVE1
